# Supplementary material
Source: PubMed Central journal article supplement (PMC3943533)
Supplement: NIHMS550176-supplement-10.pdf [file NIHMS550176-supplement-10.pdf]

**Table S1**

| <b>Name of gene</b>                   | <b>Gene symbol</b> | <b>Accession no.</b> | <b>Fold change</b> |
|---------------------------------------|--------------------|----------------------|--------------------|
| <b>Nuclear Receptor Coactivator 3</b> | <i>NCOA3</i>       | NM_001174087         | - 5.55             |
| <b>Cluster of Differentiation 24</b>  | <i>CD24</i>        | NM_013230            | 32.63              |
| <b>Delta-like 1</b>                   | <i>DLL1</i>        | NM_005618            | - 4.76             |
| <b>Delta-like 3</b>                   | <i>DLL3</i>        | NM_016941            | - 6.25             |
| <b>Mucin 1</b>                        | <i>MUC1</i>        | NM_002456.4          | 9.40               |
