# Supplementary material
Source: PubMed Central journal article supplement (PMC3943533)
Supplement: NIHMS550176-supplement-11.pdf [file NIHMS550176-supplement-11.pdf]

**Table S2 : Primers used for qRT-PCR Analysis**

| <b>Gene</b>          | <b>Forward Primer</b>                         | <b>Reverse Primer</b>                     |
|----------------------|-----------------------------------------------|-------------------------------------------|
| <i>AIB1</i>          | 5'- GCG GCG AGT TTC CGA TTT A -3'             | 5'- GCT CCC GTC TCC GTT TTT CA -3'        |
| <i>CD24</i>          | 5'- AAA CAA CAA CTG GAA CTT CAA GTA ACT C -3' | 5'- GGT GGT GGC ATT AGT TGG ATT T -3'     |
| <i>CD44</i>          | 5'- GCC TGG CGC AGA TCG ATT TGA ATA -3'       | 5'- ATC CGA TGC TCA GAG CTT TCT CCA -3'   |
| <i>CD49f</i>         | 5'- CCT CCC TGA GCA CAT ATT CG -3'            | 5'- CAC CTC CAA CTT CTC CAT CTC -3'       |
| <i>DLL1</i>          | 5'- CTT CCC CTT CGG CTT CAC -3'               | 5'- CTT TCT GGG TTT TCT GTT GCG -3'       |
| <i>DLL3</i>          | 5'- CTC CCG GAT GCA CTC AAC -3'               | 5'- CGT AGA TGG AAG GAG CAG ATA TG -3'    |
| <i>GATA3</i>         | 5'- GCG GGC TCT ATC ACA AAA TG -3'            | 5'- TCC CCA TTG GCA TTC CTC -3'           |
| <i>HER2</i>          | 5'- AAA GGC CCA AGA CTC TCT CC -3'            | 5'- CAA GTA CTC GGG GTT CTC CA -3'        |
| <i>HER3</i>          | 5'- CAG GTG CTG GGC TTG CTT TT -3'            | 5'- GTG GCT GGA GTT GGT GTT AT -3'        |
| <i>HES1</i>          | 5'- AGA AAA ATT CCT CGT CCC CG -3'            | 5'- TCT TGC TCT TCG TCT TTT CTC C -3'     |
| <i>HEY</i>           | 5'- CCC CAA CTA CAT CTT CCC AG -3'            | 5'- ATC CTT GCT CCA TTA CCT GC -3'        |
| <i>JAG1</i>          | 5'- TGC CAG TCT TCA CCT TGT G -3'             | 5'- CAT CTG GTA TCA CAC TCC CC -3'        |
| <i>JAG2</i>          | 5'- CGT CAT CCC CTT CCA GTT C -3'             | 5'- GTA TCG TTG TCC CAG TCC C -3'         |
| <i>MUC1</i>          | 5'- TCC TCA CAG TGC TTA CAG TTG -3'           | 5'- AGA AAG AGA CCC CAG TAG ACA -3'       |
| <i>NOTCH1</i>        | 5'- CTC AAC CCC TAC AAG ATC G -3'             | 5'- GAA CAG AAG CAC AAA GGC G -3'         |
| <i>NOTCH2</i>        | 5'- ACC CTC ACC TTG TGT CAA TG -3'            | 5'- ACA AAC CCC TCC ATT CTG AC -3'        |
| <i>NOTCH3</i>        | 5'- CTG CGA AGT GAA CAT TGA CG -3'            | 5'- TGA TCT CCA CGT TAC AAA GGG -3'       |
| <i>NOTCH4</i>        | 5'- CTA CTT GCC ACC TTC CAC TG -3'            | 5'- CAC ACT CGT TGG TCT CCA C -3'         |
| <i>αSMA</i>          | 5'- CTG TTC CAG CCA TCC TTC AT -3'            | 5'- CCG TGA TCT CCT TCT GCA TT -3'        |
| <i>human β2m</i>     | 5'- CTT AGC TGT GCT CGC GCT ACT CT -3'        | 5'- CCA TTC TCT GCT GGA TGA CGT GAG T -3' |
| <i>mouse β-actin</i> | 5'- GGC GCT TTT GAC TCA GGA TTT AA -3'        | 5'- CCT CAG CCA CAT TTG TAG AAC TTT -3'   |
